# Supplementary material for: Comparison of echocardiographic indices of right ventricular systolic function and ejection fraction obtained with continuous thermodilution in critically ill patients
Source: Springer Nature journal article supplement (doi:10.1186/s13054-019-2582-7), 2019-09-13

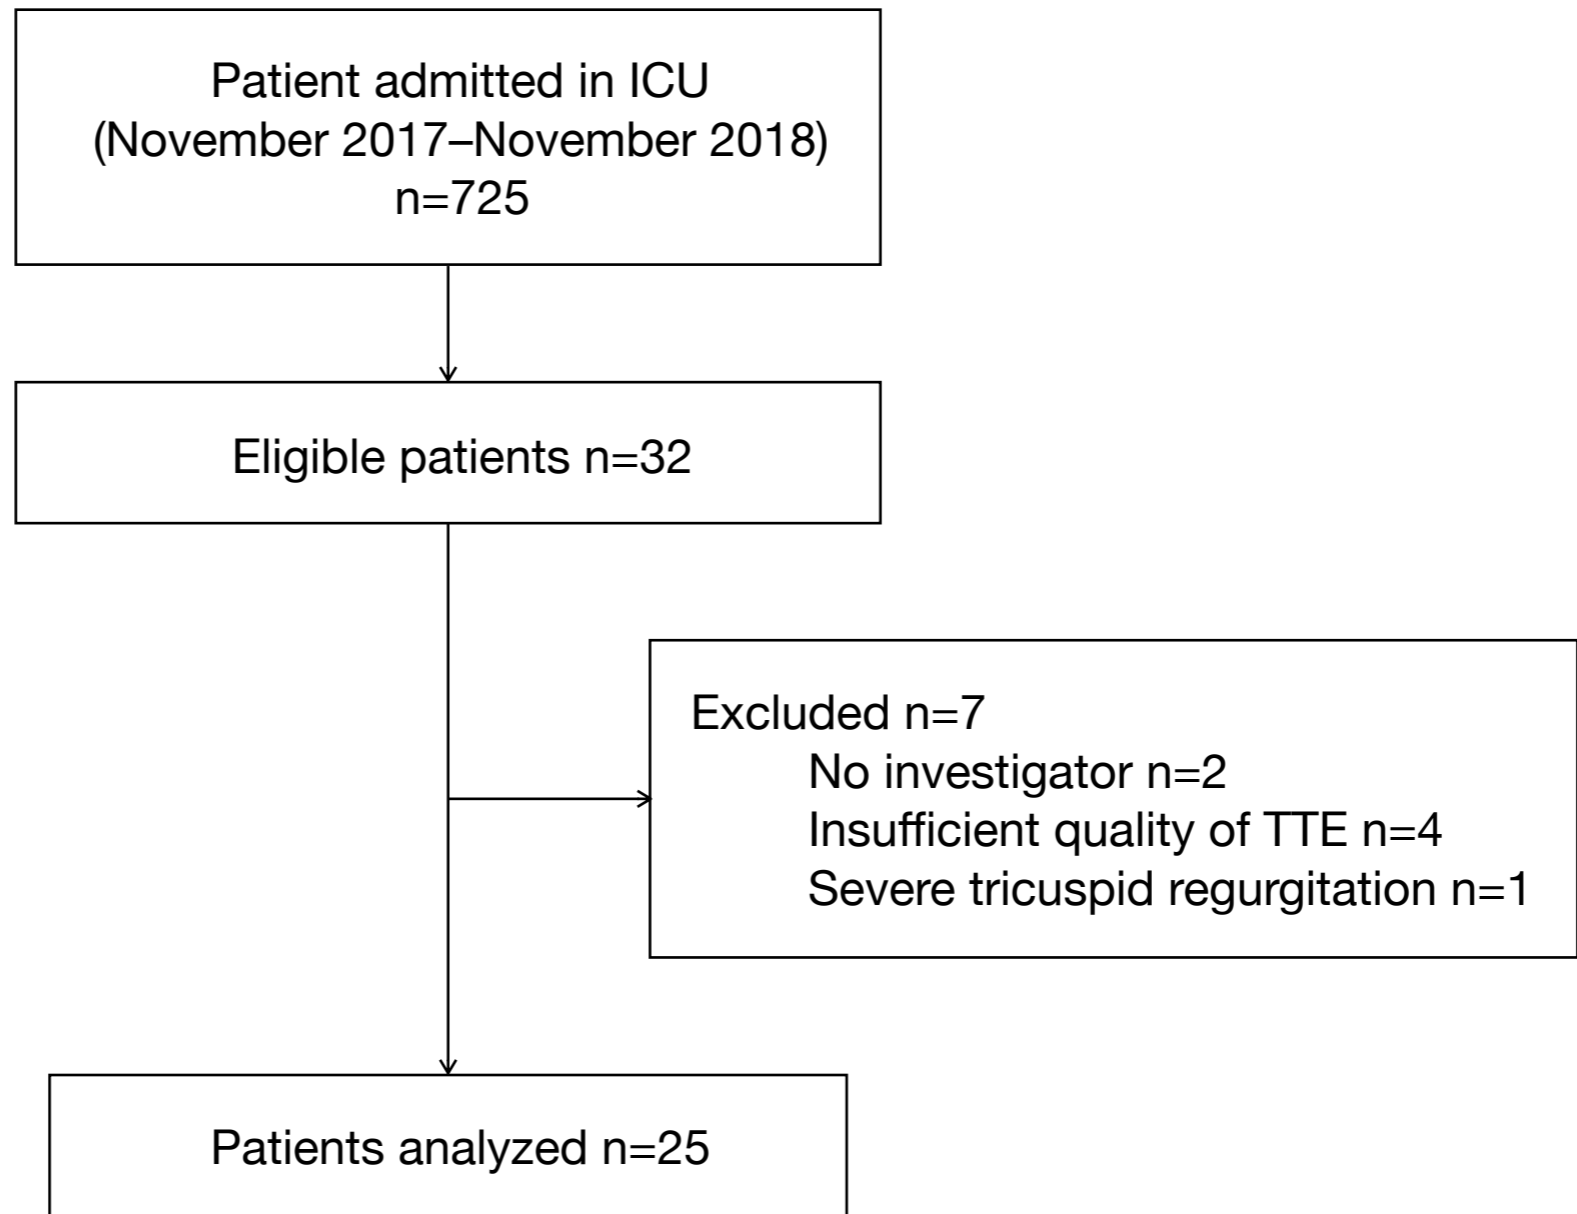

Supplement: MOESM2 [file 17170352]
